# Supplementary material for: Dietary Intake of Masters Athletes: A Systematic Review
Source: MDPI journal article supplement (doi:10.3390/nu15234973), 2023-11-30
Supplement: s1 [file s1]

Table S1: Medline<sup>†</sup> search strategy

| #  | Search Statement                                                                                        | Results |
|----|---------------------------------------------------------------------------------------------------------|---------|
| 1  | ((Master* or former or #lder or senior or veteran* or middle-age* or elite or mature) adj1 athlet*).tw. | 4361    |
| 2  | ((Master* or World) adj2 Games).tw.                                                                     | 142     |
| 3  | 1 or 2                                                                                                  | 4486    |
| 4  | Sport/                                                                                                  | 31829   |
| 5  | Endurance.tw.                                                                                           | 32350   |
| 6  | sport*.tw.                                                                                              | 83472   |
| 7  | Ultra-endurance.tw.                                                                                     | 373     |
| 8  | Sprint*.tw.                                                                                             | 9687    |
| 9  | ((mixed or team or skill*) adj1 sport*).tw.                                                             | 2717    |
| 10 | run*.tw.                                                                                                | 206666  |
| 11 | ((long or short or trail or marathon or orienteer*) adj2 run*).tw.                                      | 12408   |
| 12 | jog*.tw.                                                                                                | 2522    |
| 13 | swim*.tw.                                                                                               | 42936   |
| 14 | row*.tw.                                                                                                | 27813   |
| 15 | soccer.tw.                                                                                              | 9460    |
| 16 | football.tw.                                                                                            | 10004   |
| 17 | (Track adj2 field).tw.                                                                                  | 896     |
| 18 | weight?lift*.tw.                                                                                        | 989     |
| 19 | power?lift*.tw.                                                                                         | 237     |
| 20 | wrestl*.tw.                                                                                             | 2032    |
| 21 | walk*.tw.                                                                                               | 128252  |
| 22 | "Body Build*".tw.                                                                                       | 1206    |
| 23 | skii*.tw.                                                                                               | 2600    |
| 24 | triathl*.tw.                                                                                            | 1756    |
| 25 | vigorous.tw.                                                                                            | 27370   |
| 26 | aerobic.tw.                                                                                             | 90408   |
| 27 | anaerobic.tw.                                                                                           | 80035   |
| 28 | ((High or Low) adj1 intensity).tw.                                                                      | 43999   |

|    |                                                                                                                                                                                              |         |
|----|----------------------------------------------------------------------------------------------------------------------------------------------------------------------------------------------|---------|
| 29 | exercise.tw.                                                                                                                                                                                 | 277260  |
| 30 | "Physical* Activ*".tw.                                                                                                                                                                       | 129220  |
| 31 | (Rugby adj1 (League or Union)).tw.                                                                                                                                                           | 1661    |
| 32 | ((Habitual or chronic*) adj1 (exercise* or train*)).tw.                                                                                                                                      | 2084    |
| 33 | Athletic*.tw.                                                                                                                                                                                | 18444   |
| 34 | ((strength or resistance) adj1 (train* or exercis*)).tw.                                                                                                                                     | 19349   |
| 35 | Cycling.tw.                                                                                                                                                                                  | 66844   |
| 36 | Cyclist*.tw.                                                                                                                                                                                 | 5603    |
| 37 | 4 or 5 or 6 or 7 or 8 or 9 or 10 or 11 or 12 or 13 or 14 or 15 or 16 or 17 or 18 or 19 or 20 or 21 or 22 or 23 or 24 or 25 or 26 or 27 or 28 or 29 or 30 or 31 or 32 or 33 or 34 or 35 or 36 | 1046387 |
| 38 | 3 and 37                                                                                                                                                                                     | 3889    |
| 39 | diet.tw.                                                                                                                                                                                     | 346666  |
| 40 | ((Energy or diet* or nutri*) adj1 intake).tw.                                                                                                                                                | 55546   |
| 41 | calori*.tw.                                                                                                                                                                                  | 92353   |
| 42 | Kilojoule*.tw.                                                                                                                                                                               | 311     |
| 43 | M#cronutrient*.tw.                                                                                                                                                                           | 26046   |
| 44 | Carbohydrate*.tw.                                                                                                                                                                            | 141555  |
| 45 | Protein*.tw.                                                                                                                                                                                 | 3204677 |
| 46 | fat*.tw.                                                                                                                                                                                     | 938234  |
| 47 | vitamin*.tw.                                                                                                                                                                                 | 221820  |
| 48 | mineral*.tw.                                                                                                                                                                                 | 185598  |
| 49 | alcohol*.tw.                                                                                                                                                                                 | 353954  |
| 50 | (Diet* adj1 (quality or assessment or indicat* or pattern*)).tw.                                                                                                                             | 19199   |
| 51 | ((("weigh* food" or Food or diet*) adj1 record*)).tw.                                                                                                                                        | 6449    |
| 52 | "Food diar*".tw.                                                                                                                                                                             | 1629    |
| 53 | "Food frequency questionnaire*".tw.                                                                                                                                                          | 13171   |
| 54 | Questionnaire*.tw.                                                                                                                                                                           | 567493  |
| 55 | Survey*.tw.                                                                                                                                                                                  | 712884  |
| 56 | "24 hour recall".tw.                                                                                                                                                                         | 1116    |
| 57 | NRV.tw.                                                                                                                                                                                      | 84      |
| 58 | DRI.tw.                                                                                                                                                                                      | 1378    |
| 59 | AMDR.tw.                                                                                                                                                                                     | 70      |

|    |                                                                                                                                                                      |         |
|----|----------------------------------------------------------------------------------------------------------------------------------------------------------------------|---------|
| 60 | RDI.tw.                                                                                                                                                              | 1606    |
| 61 | RDA.tw.                                                                                                                                                              | 3329    |
| 62 | (Western adj1 (food* or diet*)).tw.                                                                                                                                  | 4281    |
| 63 | Nutrit*.tw.                                                                                                                                                          | 307557  |
| 64 | Nutrient*.tw.                                                                                                                                                        | 159433  |
| 65 | fiber.tw.                                                                                                                                                            | 164907  |
| 66 | fibre.tw.                                                                                                                                                            | 40407   |
| 67 | 39 or 40 or 41 or 42 or 43 or 44 or 45 or 46 or 47 or 48 or 49 or 50 or 51 or 52 or 53 or 54 or 55 or 56 or 57 or 58 or 59 or 60 or 61 or 62 or 63 or 64 or 65 or 66 | 6254568 |
| 68 | 38 and 67                                                                                                                                                            | 1196    |

<sup>a</sup>Via Ovid
